# Supplementary material for: Diatom ecological response to deposition of the 833-850 CE White River Ash (east lobe) ashfall in a small subarctic Canadian lake
Source: PeerJ. 2019 Jan 25;7:e6269. doi: 10.7717/peerj.6269 (PMC6348948; doi:10.7717/peerj.6269)
Supplement: Table S1 [file peerj-07-6269-s002.xlsx]

## Sheet: Sheet3
Depth (cm)	Achnanthidium atomus	Achnanthidium sp2	Achnanthidium minutissimum	Achnanthidium sp4	Achnanthidium sp5	Amphora sp1	Aneumastus sp1	Brachysira microcephala	Cyclostephanos invisitatus	Lindavia michiganiana	Cyclotella distinguenda	Discostella pseudostelligera	Cyclotella sp5	Cyclotella sp6	Cymbopleura sp1	Denticula elegans	Encyonema sp1	Encyonopsis falaisensis	Encyonema sp3	Encyonema sp4	Encyonema sp5	Encyonema hebridicum	Encyonema sp7	Encyonema sp8	Encyonopsis microcephala	Hantzschia amphioxys	Mayamaea sp1	Unidentified taxa 11	Unidentified taxa 12	Unidentified taxa 13	Unidentified taxa 14	Unidentified taxa 15	Unidentified taxa 16	Unidentified taxa 17	Unidentified taxa 18	Unidentified taxa 19	Unidentified taxa 2	Unidentified taxa 20	Unidentified taxa 21	Unidentified taxa 3	Unidentified taxa 4	Unidentified taxa 5	Unidentified taxa 6	Unidentified taxa 7	Unidentified taxa 8	Unidentified taxa 9	Navicula schweigeri	Navicula sp10	Navicula sp11
52	0	0	17	4	0	0	0	75	0	4	7	0	0	0	0	0	7	7	0	2	0	1	0	0	53	0	0	0	0	0	0	0	0	0	0	0	2	0	0	0	0	0	0	0	0	0	0	0	0
53	19	5	9	6	2	41	6	2	5	1	2	2	2	5	14	0	4	15	1	2	1	1	3	1	6	2	22	26	2	23	5	2	1	10	16	79	12	10	47	43	7	1	4	58	20	48	0	0	0
54	11	0	28	5	2	0	0	48	3	4	5	8	3	1	0	0	3	19	0	1	2	1	2	0	44	0	1	0	0	0	0	0	0	0	0	0	3	0	0	3	0	0	0	1	0	0	2	5	0
54.5	19	0	14	3	10	0	0	107	2	4	5	4	0	1	3	0	3	3	3	1	3	11	3	0	56	2	1	2	0	0	3	0	0	0	1	0	3	0	0	4	0	0	0	1	0	0	17	7	2
54.6	14	0	14	2	3	0	0	105	5	5	3	7	0	0	5	2	4	12	2	1	6	10	6	0	53	3	0	2	0	0	1	0	1	0	0	0	1	0	0	6	0	0	1	0	0	0	22	0	4
54.7	24	0	17	2	6	0	0	80	2	2	2	5	0	0	2	0	3	10	0	3	3	19	6	0	66	1	3	2	0	0	0	0	0	0	0	0	0	0	0	1	1	8	0	0	0	0	0	2	6
54.8	25	0	13	3	4	0	0	123	1	9	5	3	0	0	3	1	3	6	1	2	3	0	1	0	59	3	0	1	0	0	2	1	1	0	0	0	2	0	0	0	0	2	2	1	0	0	0	0	0
54.9	14	1	15	6	2	1	0	95	2	1	8	15	0	2	4	2	3	15	3	1	0	15	7	0	65	5	2	0	0	0	10	0	1	0	0	0	0	0	0	0	0	0	0	4	0	0	21	2	3
55	33	1	11	2	7	0	0	87	3	7	5	9	0	0	1	1	6	5	7	0	2	6	8	1	55	2	1	0	0	0	2	0	4	0	0	0	0	0	0	9	1	0	0	0	0	0	18	0	7
55.1	22	1	8	3	7	1	0	78	3	7	12	15	0	0	0	2	3	6	0	0	5	7	1	0	78	1	0	1	0	1	2	0	0	0	0	0	3	0	0	0	0	0	0	0	0	0	19	8	2
55.2	34	0	11	5	4	0	0	99	2	5	10	10	0	0	0	3	4	9	0	1	6	3	1	0	91	4	0	0	3	0	0	0	0	0	0	0	0	0	0	1	0	0	0	1	0	0	10	1	6
55.3	40	0	18	3	2	1	0	96	3	6	12	14	0	0	3	2	4	7	0	3	3	3	2	0	74	6	1	2	0	0	0	0	0	0	0	0	1	0	0	1	0	0	0	0	1	0	20	3	0
55.4	30	0	15	0	0	3	0	68	4	17	8	11	0	0	0	11	5	6	0	1	4	7	3	0	65	2	3	2	4	0	0	0	0	0	0	0	0	0	0	2	2	0	0	0	0	0	0	0	3
55.5	22	0	11	2	7	0	0	77	6	10	8	15	2	0	2	13	6	7	0	0	5	6	4	0	58	2	4	0	0	0	0	0	0	0	0	0	0	0	0	0	0	1	0	0	0	0	10	0	3
55.6	24	0	17	4	0	1	0	60	4	21	9	18	0	0	0	5	5	6	1	3	6	4	0	0	68	5	5	0	0	0	0	0	0	0	0	0	5	0	0	0	0	0	0	0	0	0	4	0	5
55.7	21	0	10	1	3	1	0	78	1	11	8	17	0	0	0	6	4	8	0	2	7	10	4	0	65	4	3	0	0	0	0	0	0	0	0	0	5	0	0	1	0	0	4	0	0	1	9	0	7
55.8	39	0	17	2	4	0	0	76	4	9	1	14	0	0	1	1	3	2	5	2	2	7	3	0	73	5	0	0	0	0	1	0	0	0	0	0	5	0	0	1	0	0	0	0	0	0	21	0	1
55.9	31	1	13	3	3	2	0	79	13	7	12	16	0	0	0	4	7	6	1	0	2	12	3	0	51	3	0	2	0	0	0	0	2	1	0	1	0	0	0	0	0	0	3	4	0	0	11	5	7
56	28	2	12	5	3	0	0	71	2	5	5	14	0	0	1	0	3	7	6	0	1	11	5	0	53	9	0	1	0	0	3	0	0	0	0	0	0	0	0	0	0	2	3	0	1	0	14	2	7
56.1	36	0	9	6	9	0	1	77	0	8	14	15	0	2	1	2	4	4	2	0	5	6	8	0	59	4	0	0	0	0	3	0	1	0	0	0	0	0	0	4	0	0	1	0	0	0	21	5	3
56.2	25	1	10	7	9	1	0	92	4	11	9	19	0	0	1	3	6	10	3	0	5	7	1	0	54	1	0	1	0	0	2	0	2	0	0	0	0	0	0	1	0	0	0	0	0	14	3	5	3
56.3	27	1	10	1	4	0	0	111	4	11	8	16	0	1	1	2	4	7	4	1	2	8	5	0	49	5	0	0	0	0	4	0	0	0	0	0	0	0	0	2	0	0	0	0	0	0	21	3	4
56.4	34	0	18	5	8	1	0	64	4	7	4	11	0	0	3	2	4	8	3	1	0	18	0	0	23	0	3	0	0	0	0	0	0	0	0	0	0	0	0	1	0	0	0	0	1	0	22	1	4
[truncated: 30 more columns]
